# Supplementary material
Source: PubMed Central journal article supplement (PMC545835)
Supplement: pnas_102_4_1240__1.pdf [file pnas_102_4_1240__1.pdf]

**Table 1.** Primer sequences used for RT-PCR

| Target gene | Direction | Nucleotide sequence                  |
|-------------|-----------|--------------------------------------|
| IGFBP-1     | Forward   | 5'-CTT CTG AAC TTC TTC TGG GTG G-3'  |
|             | Reverse   | 5'-CCC GTT ATG AGA CTC CGG ATG AT-3' |
| IGFBP-2     | Forward   | 5'-GGA CAC GAT GTT GTC CTA TGT G-3'  |
|             | Reverse   | 5'-GGA TCC ATC TCT TGA CCG TCA A-3'  |
| IGFBP-3     | Forward   | 5'-TAA GTG TGC GCG TGT TCA GC-3'     |
|             | Reverse   | 5'-GAG TCC ATG CCT CAG CAT AC-3'     |
| IGFBP-5     | Forward   | 5'-ATG GCT CTT CTT GTG CTG GGT A-3'  |
|             | Reverse   | 5'-CTC ACT CGT TGT TGT TGT TGC TG-3' |
| IGF-1       | Forward   | 5'-CTA GCG GTC ATT TCT TCC AG-3'     |
|             | Reverse   | 5'-ACA GGC GCA CAA TAC ATC TC-3'     |
| IGF-2       | Forward   | 5'-ACA GCC ACA AGC ATC ACT CA-3'     |
|             | Reverse   | 5'-ACA GCT CCG AAA GCA GCA TT-3'     |
| IGF-1Ra     | Forward   | 5'-CAA CAG CAC ACT AGT GTC G-3'      |
|             | Reverse   | 5'-GAT GAC AGC TAC GAT CAC GA-3'     |
| odc         | Forward   | 5'-GGA TGT CCT GAA GAA GCA CCT-3'    |
|             | Reverse   | 5'-CCC ACT GAC TGC ACG ATC TGG-3'    |
