# Supplementary material
Source: PubMed Central journal article supplement (PMC545835)
Supplement: pnas_102_4_1240__2.pdf [file pnas_102_4_1240__2.pdf]

**Table 2.** Sequences of morpholino oligo

| Target region           | Nucleotide sequence                     |
|-------------------------|-----------------------------------------|
| IGFBP-1 exon 1/intron 1 | 5'-ATA AAC CTG TAC CTG GTG CTG TCT C-3' |
| IGFBP-1 exon 3/intron 3 | 5'-GAC GAC TCT TCT CAC CTG TTT GAT T-3' |
| Control                 | 5'-CCT CTT ACC TCA GTT ACA ATT TAT A-3' |
